# Supplementary material
Source: PubMed Central journal article supplement (PMC5074628)
Supplement: supp_pp.16.00640_PP2016-00640DR1_Supplemental_Materialtbl.pdf [file supp_pp.16.00640_PP2016-00640DR1_Supplemental_Materialtbl.pdf]

1 Table S1: Primers sequences used in this study

2 **Quantitative real-time PCR primers**

| Gene Name      | ATG number | Forward primer          | Reverse primer           |
|----------------|------------|-------------------------|--------------------------|
| <i>ACT2</i>    | At3g18780  | CTTGCACCAAGCAGCATGAA    | CCGATCCAGACACTGTACTTCCTT |
| <i>TAFII15</i> | At4g31720  | GAATCACGGCCAACAATC      | ACTCTTAGCCAAGTAGTGCTCC   |
| <i>UBC21</i>   | At5g25760  | ACTCTTAGCCAAGTAGTGCTCC  | GAATCACGGCCAACAATC       |
| <i>HEMA1</i>   | At1g58290  | GCTTCGCGAGTCTTCAAAC     | GGCATCTCCTCACGGATAGC     |
| <i>GSA1</i>    | At5g63570  | CTTACCAGCTTCTAACCGATG   | CACCTCCAGGCATTAGATTCTTAG |
| <i>GUN4</i>    | At3g59400  | CTGCTCTGCTTCTCCACCT     | TCTCCTCGTCGGCTTGTCT      |
| <i>GUN5</i>    | At5g13630  | CCTCAATGTGTTTGCTTCCA    | GTTTCCCCCAGTTTTCTTCC     |
| <i>CHLM</i>    | At4g25080  | TTTCTGCTGCTATGGTTGCT    | GCTTTGTTCTGCGGGTAATG     |
| <i>PORA</i>    | At5g54190  | ACCCTCTTCCCTCCTTCC      | TTCTCGCTGACTTCCCAAAC     |
| <i>PORB</i>    | At4g27440  | CGGTGATTGAGGGGTTTAG     | AAGAGGGCACGGAAGAGAG      |
| <i>LHCB1</i>   | At1g29910  | GTGACAATGGCTTGAACGAA    | GGCTACAGAGTCGCAGGAAA     |
| <i>LHCB6</i>   | At1g15820  | AGGTGGTGGCAACTTCCTTGAC  | AACCCGAAATCTCCTGGTAGCG   |
| <i>GNC</i>     | At5g56860  | AGGGTTGTTCGTGATGGTTT    | TTGGACTCTTTTGCCGTCT      |
| <i>GNL</i>     | At4g26150  | CCGTCTCTTCTACTTTTCTT    | TCACTTGATGATGAACCACC     |
| <i>ARR5</i>    | At3g48100  | CTACTCGCAGCTAAAACGC     | GCCGAAAGAATCAGGACA       |
| <i>ARR15</i>   | At1g74890  | CTGCTTGTAAGTGACGACTGTTG | AGTTCATATCCTGTTAGTCCCGGC |

3

4 **ChIP qPCR primers**

| Gene Name         | Forward primer           | Reverse primer           |
|-------------------|--------------------------|--------------------------|
| <b>5' HEMA1</b>   | TCTCAATGCATTCTCATTACA    | AAGGAGATCGCTGTGAATATG    |
| <b>3' HEMA1</b>   | TTTGTGTGCAAGAGACTAACA    | CTGGGACCAATACCATTACAC    |
| <b>5' LHCB6</b>   | GTGTGGGTGATGTGGATATG     | AGAGGAGATTTAGAGGGACAA    |
| <b>3' LHCB6</b>   | GGAGATTCTTCGATCCGTTG     | GTGCTTAATCTCTGCCAATTTT   |
| <b>5' LHCB1.2</b> | CTAGAGACTGCCACATAAGAATAG | ACTTGTGAGTGAGAGTGATTG    |
| <b>3' LHCB1.2</b> | CCGATCCAGTCAACAACAA      | AAGTCTCAAACCATCACATACA   |
| <b>5' ARR15</b>   | GATTATGACCGTGAAGACACA    | GAGAAAAGAGGAGGAGATTTAAGG |
| <b>5' TUB2</b>    | CACAAAGGAAGTTGACGAGCAG   | CGCCTGAACATCTCTTGATTG    |

5

6
